# Supplementary material for: Controlled molecular assemblies of chiral boron dipyrromethene derivatives for circularly polarized luminescence in the red and near-infrared regions
Source: Royal Society of Chemistry journal article supplement (doi:10.1039/d2tc05006d), 2023-01-01
Supplement: d2tc05006d1.pdf [file d2tc05006d1.pdf]

## Electronic Supplementary Information

Controlled molecular assemblies of chiral boron  
dipyrromethene derivatives for circularly polarized  
luminescence in the red and near-infrared regions

Hayato Sakai,<sup>\*a</sup> Yudai Suzuki,<sup>a</sup> Makoto Tsurui,<sup>b</sup> Yuichi Kitagawa,<sup>b</sup> Takuya Nakashima,<sup>cd</sup>  
Tsuyoshi Kawai,<sup>d</sup> Yuta Kondo,<sup>e</sup> Go Matsuba,<sup>e</sup> Yasuchika Hasegawa<sup>\*b</sup> and Taku Hasobe<sup>\*a</sup>

<sup>a</sup>Department of Chemistry, Faculty of Science and Technology, Keio University, 3-14-1  
Hiyoshi, Yokohama, Kanagawa 223-8522 Japan.

<sup>b</sup>Faculty of Engineering and Institute for Chemical Reaction Design and Discovery (WPI-  
ICReDD), Hokkaido University, Sapporo, Hokkaido 060-8628, Japan.

<sup>c</sup>Department of Chemistry, Graduate School of Science, Osaka Metropolitan University,  
Sumiyoshi, Osaka 558-8585, Japan.

<sup>d</sup>Graduate School of Materials Science, Nara Institute of Science and Technology, Ikoma,  
Nara 630-0192 Japan.

<sup>e</sup>Graduate School of Organic Materials Science, Yamagata University, Yonezawa,  
Yamagata 992-8510, Japan.

## Experimental

**X-ray Diffraction Measurements.** X-ray diffraction (XRD) measurements were carried out with a D8 ADVANCE (Bruker) using Ni-filtered Cu K $\alpha$  line radiation ( $\lambda = 1.5418 \text{ \AA}$ ). The accelerating voltage was set at 40 kV with 20 mA current, and profiles were collected in the  $5^\circ < 2\theta < 40^\circ$  range with a step size of  $0.03^\circ$ .

**Small-angle X-ray scattering (SAXS) measurements.** Small-angle X-ray scattering (SAXS) measurements were carried out with beam-line BL6A, Photon Factory, KEK, Japan (Proposal No. 21G524 and 22G027).

. The scattering vector,  $q$ , is defined as

$$q = \frac{4\pi}{\lambda} \sin \theta \quad (1),$$

where  $2\theta$  and  $\lambda$  are the scattering angle and wavelength ( $1.5 \text{ \AA}$ ), respectively. The camera length was 2410 mm. A PILATUS 2M detector (Dectris AG, Baden, Switzerland) detector was used with a  $q$  range of 0.07 to  $2.0 \text{ nm}^{-1}$ . Data processing, which included controlling the contrast of the 2D-patterns and the preparation of a 1D-profile from the obtained 2D-patterns, was performed using the FIT-2D software (Ver. 12.077, Andy Hammersley/ESRF, Grenoble, France).

## Synthesis

**Scheme S1.** Synthetic Scheme of *R*-0Ph-B-BODIPY.

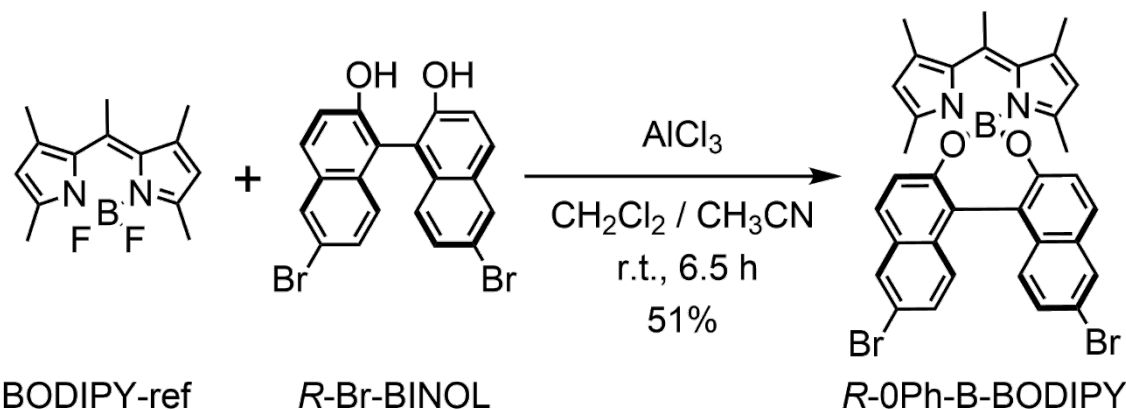

**Synthesis of *R*-0Ph-B-BODIPY.** BODIPY-ref (100 mg, 0.38 mmol),  $\text{AlCl}_3$  (76 mg, 0.57 mmol) were dissolved in  $\text{CH}_2\text{Cl}_2$  (10 ml) and refluxed for 30 min. After cooling down to room temperature, enantiopure *R*-Br-BINOL (337 mg, 0.76 mmol) in acetonitrile (5 ml) was added dropwise and stirred at room temperature for 6 h. Next, the solvent was washed with saturated NaCl aqueous solution, dried over anhydrous  $\text{MgSO}_4$  and evaporated. Finally, the crude was purified by chromatography on silica gel eluting with hexane/ $\text{CH}_2\text{Cl}_2$  (1/1, v/v) and enantiopure *R*-0Ph-B-BODIPY (yield: 120 mg, 51%) was obtained. *S*-0Ph-B-BODIPY was synthesized by changing from enantiopure *R*-Br-BINOL to enantiopure *S*-Br-BINOL.  $^1\text{H}$  NMR ( $\text{CDCl}_3$ )  $\delta$ : 7.96 (2H, s), 7.65 (2H, d,  $J = 10.0$  Hz), 7.21 (2H, d,  $J = 8.6$  Hz), 7.14 (2H, d,  $J = 8.6$  Hz), 7.02 (2H, d,  $J = 8.1$  Hz), 5.86 (2H, s), 2.67 (3H, s), 2.43 (6H, s), 1.67 (6H, s).  $^{13}\text{C}$ -NMR ( $\text{CDCl}_3$ )  $\delta$ : 154.87 (s), 154.36 (s), 141.19 (s), 140.80 (s), 133.01 (s), 132.06 (s), 130.94 (s), 129.82 (s), 128.62 (s), 128.54 (s), 128.32 (s), 124.94 (s), 122.18 (s), 120.94 (s), 117.08 (s), 17.66 (s), 16.95 (s), 15.96 (s). High resolution MALDI-TOF MS:  $m/z$  calcd, 664.0532; found, 664.0515 [M].

**Scheme S2.** Synthetic Scheme of *R*-1Ph-BODIPY.

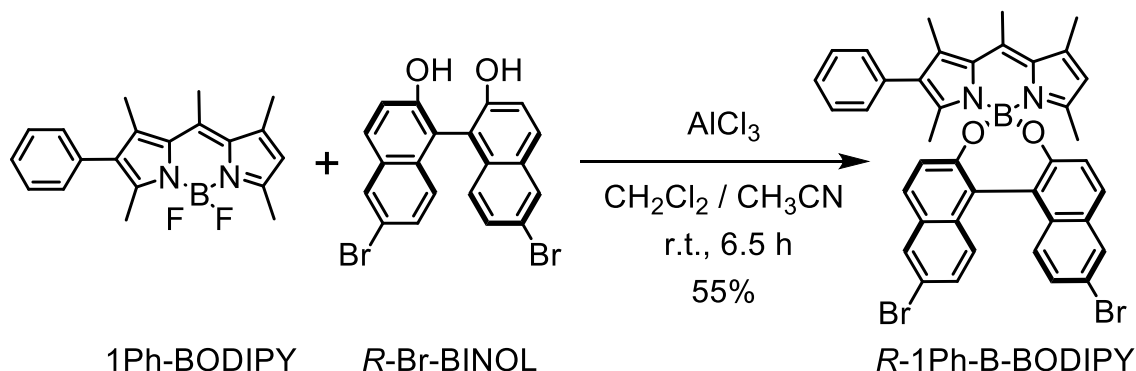

**Synthesis of *R*-1Ph-B-BODIPY.** 1Ph-BODIPY (100 mg, 0.30 mmol),  $\text{AlCl}_3$  (59 mg, 0.44 mmol) were dissolved in  $\text{CH}_2\text{Cl}_2$  (10 ml) and refluxed for 30 min. After cooling down to room temperature, enantiopure *R*-Br-BINOL (261 mg, 0.59 mmol) in acetonitrile (5 ml) was added dropwise and stirred at room temperature for 6 h. Next, the solvent was washed with saturated NaCl aqueous solution, dried over anhydrous  $\text{MgSO}_4$  and evaporated. Finally, the crude was purified by chromatography on silica gel eluting with hexane/ $\text{CH}_2\text{Cl}_2$  (1/1, v/v) and enantiopure *R*-1Ph-B-BODIPY (yield: 115 mg, 55%) was obtained. *S*-1Ph-B-BODIPY was synthesized by changing from enantiopure *R*-Br-BINOL to enantiopure *S*-Br-BINOL.  $^1\text{H}$  NMR ( $\text{CDCl}_3$ )  $\delta$ : 7.96 (2H, s), 7.67 (1H, d,  $J = 8.8$  Hz), 7.64 (1H, d,  $J = 8.8$  Hz), 7.35-7.26 (3H, m), 7.23 (3H, d,  $J = 8.8$  Hz), 7.21-7.17 (2H, m), 7.10 (1H, d,  $J = 8.8$  Hz), 7.04-6.99 (4H, m), 5.85 (1H, s), 2.74 (3H, s), 2.45 (3H, s), 2.33 (3H, s), 1.71 (3H, s), 1.64 (3H, s).  $^{13}\text{C}$  NMR ( $\text{CDCl}_3$ )  $\delta$ : 154.82 (s), 154.75 (s), 152.51 (s), 141.38 (s), 140.87 (s), 137.08 (s), 133.91 (s), 133.42 (s), 132.82 (s), 132.10 (s), 132.01 (s), 131.07 (s), 130.80 (s), 130.35 (s), 129.84 (s), 129.69 (s), 129.49 (s), 128.65 (s), 128.57 (s), 128.54 (s), 128.50 (s), 128.40 (s), 128.16 (s), 127.80 (s), 127.70 (s), 126.91 (s), 125.05 (s), 124.72 (s), 122.21 (s), 121.31 (s), 120.48 (s), 117.16 (s), 117.08 (s), 17.71 (s), 17.47 (s), 15.79 (s), 15.73 (s), 14.94 (s). High resolution MALDI-TOF MS:  $m/z$  calcd, 740.0845; found, 740.0842 [M].

**Scheme S3.** Synthetic Scheme of *R*-2Ph-B-BODIPY

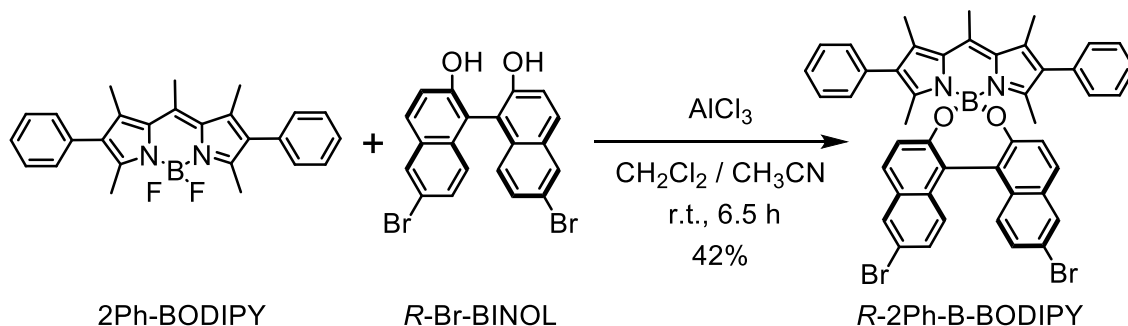

**Synthesis of *R*-2Ph-B-BODIPY.** 2Ph-BODIPY (100 mg, 0.24 mmol), AlCl<sub>3</sub> (50 mg, 0.37 mmol) were dissolved in CH<sub>2</sub>Cl<sub>2</sub> (10 ml) and refluxed for 30 min. After cooling down to room temperature, enantiopure *R*-Br-BINOL (250 mg, 0.56 mmol) in acetonitrile (5 ml) was added dropwise and stirred at room temperature for 6 h. Next, the solvent was washed with saturated NaCl aqueous solution, dried over anhydrous MgSO<sub>4</sub> and evaporated. Finally, the crude was purified by chromatography on silica gel eluting with hexane/CH<sub>2</sub>Cl<sub>2</sub> (1/1, v/v) and enantiopure *R*-2Ph-B-BODIPY (yield: 127 mg, 42%) was obtained. *S*-2Ph-B-BODIPY was synthesized by changing from enantiopure *R*-Br-BINOL to enantiopure *S*-Br-BINOL. <sup>1</sup>H NMR (CDCl<sub>3</sub>) δ: 7.96 (2H, s), 7.66 (2H, d, *J* = 8.6 Hz), 7.33-7.31 (4H, m), 7.27-7.24 (3H, m), 7.19-7.17 (3H, m), 7.01 (2H, d, *J* = 9.1 Hz), 6.96 (4H, d, *J* = 7.2 Hz), 2.81 (3H, s), 2.35 (6H, s), 1.68 (6H, s). <sup>13</sup>C NMR (CDCl<sub>3</sub>) δ: 154.66 (s), 153.05 (s), 141.60 (s), 137.24 (s), 133.99 (s), 133.90 (s), 133.30 (s), 132.08 (s), 130.98 (s), 130.36 (s), 129.74 (s), 128.62 (s), 128.58 (s), 128.26 (s), 128.20 (s), 126.97 (s), 124.86 (s), 120.92 (s), 117.18 (s), 17.94 (s), 15.80 (s), 14.78 (s). High resolution MALDI-TOF MS: *m/z* calcd, 816.1158; found, 816.1168 [M].

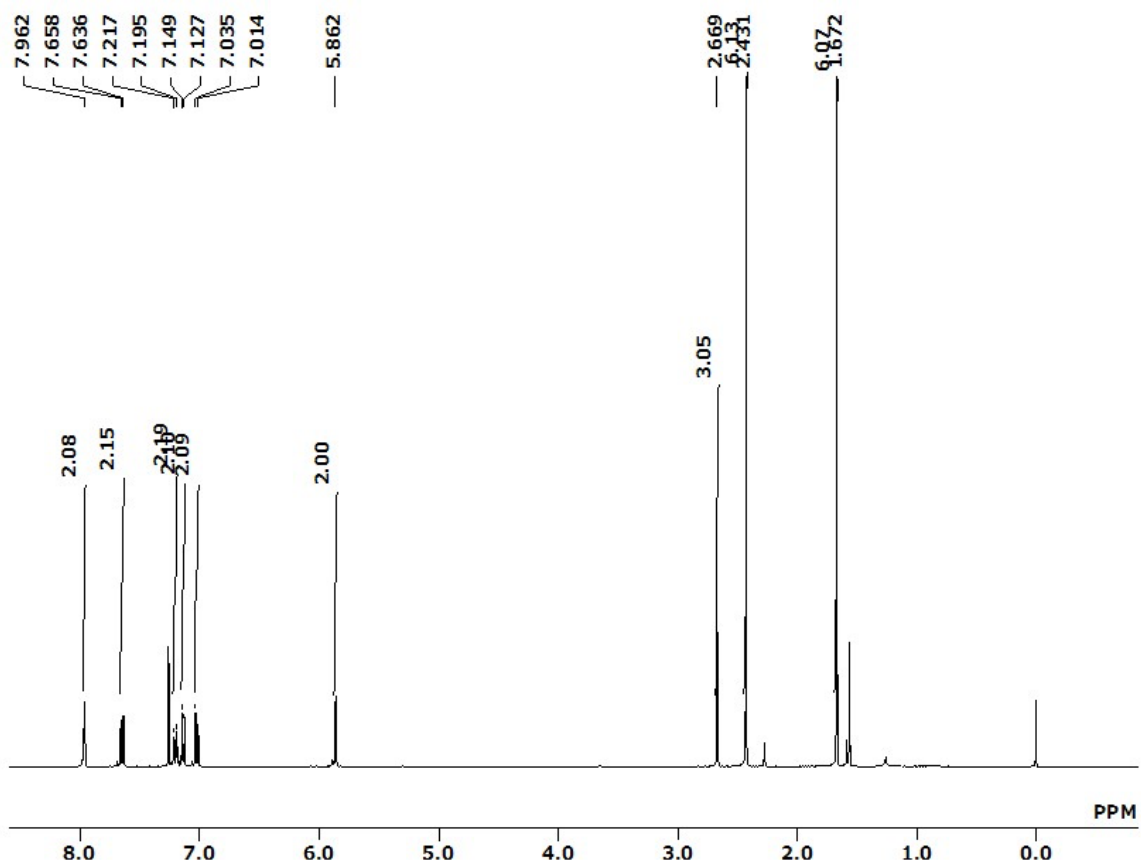

Fig. S1  $^1\text{H}$  NMR spectrum of *R*-0Ph-B-BODIPY.

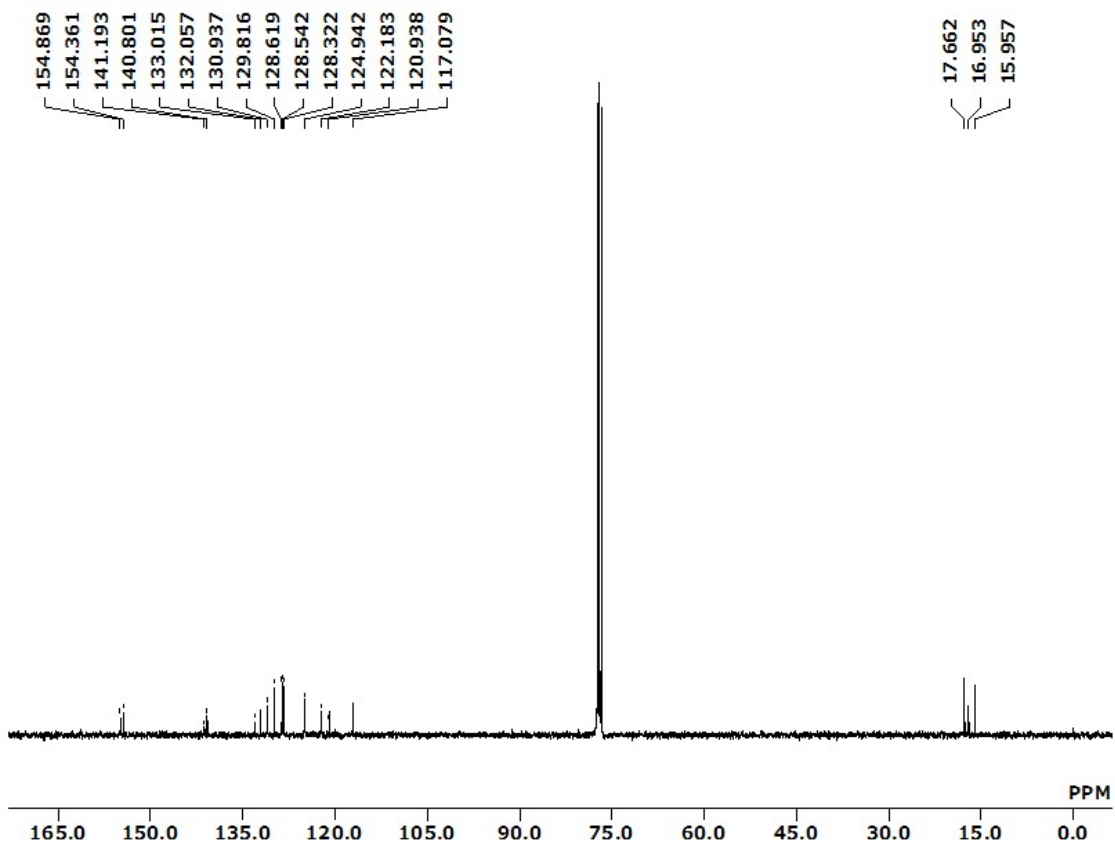

**Fig. S2**  $^{13}\text{C}$  NMR spectrum of *R*-0Ph-B-BODIPY.

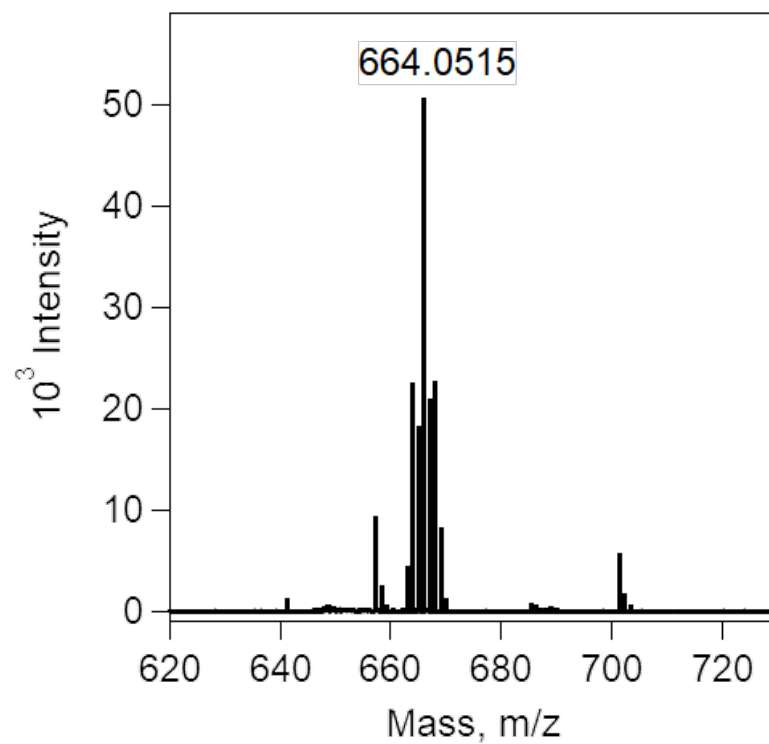

**Fig. S3** High resolution MALDI-TOF MS spectrum of *R*-0Ph-B-BODIPY.



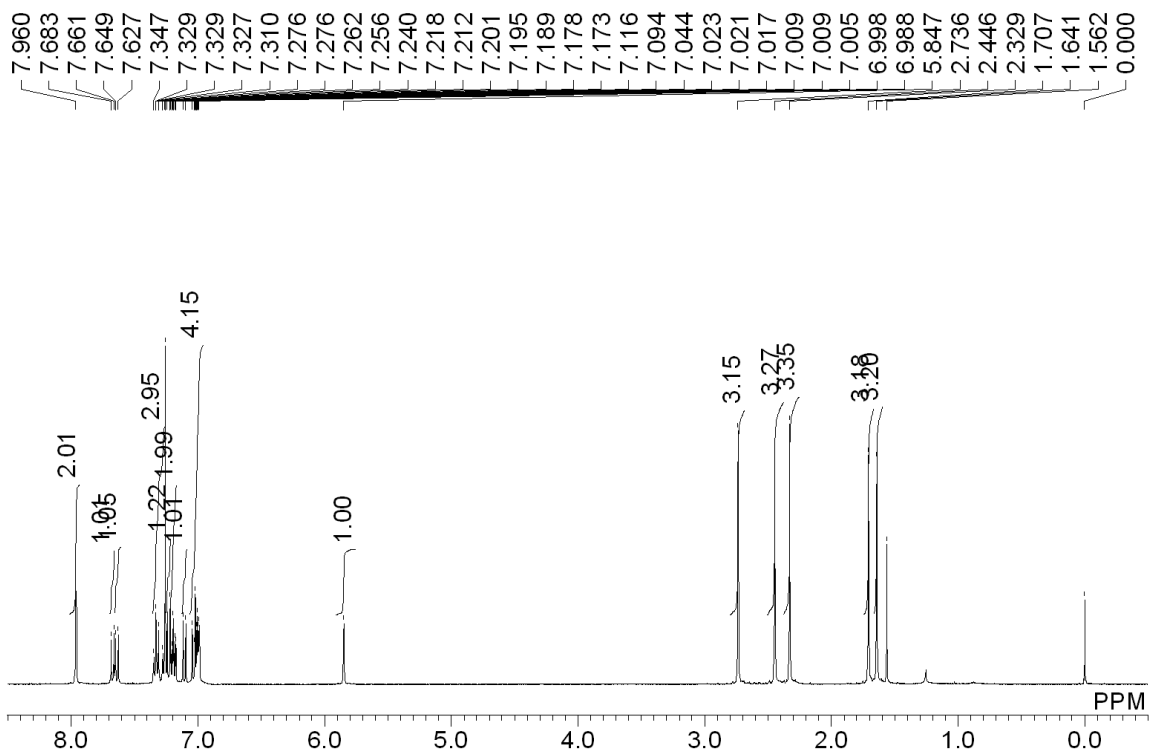

**Fig. S4**  $^1\text{H}$  NMR spectrum of *R*-1Ph-B-BODIPY.

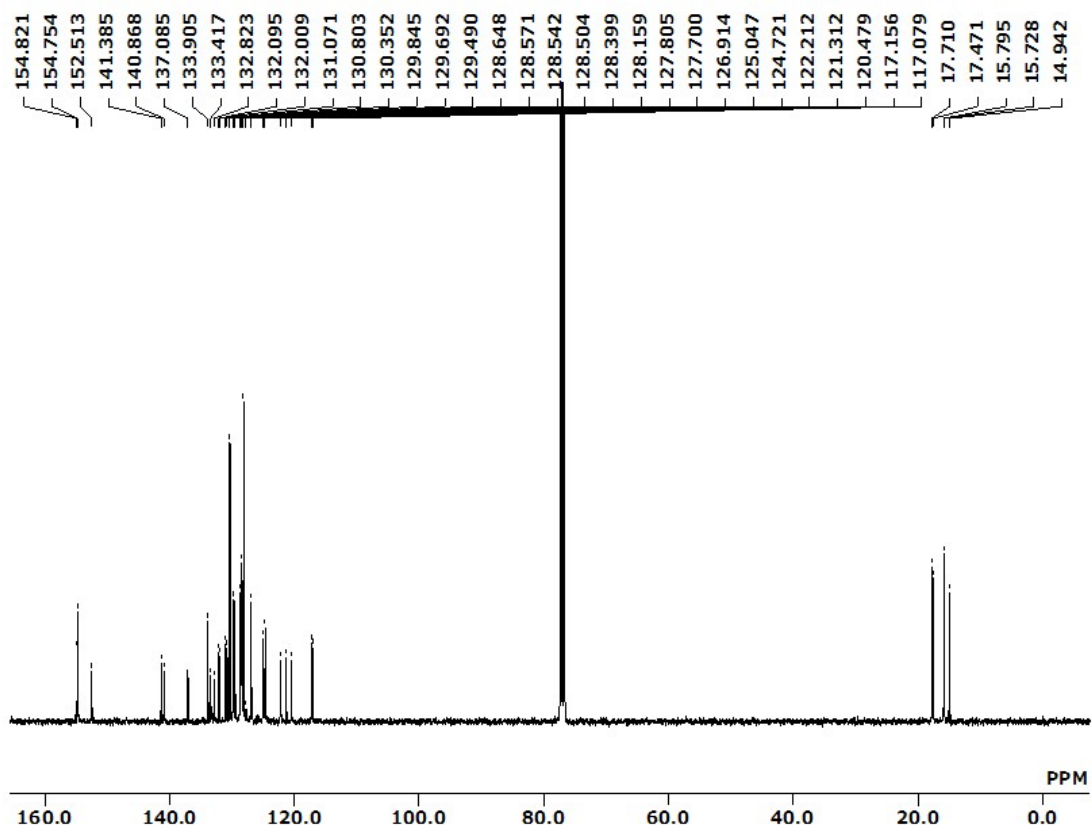

Fig. S5  $^{13}\text{C}$  NMR spectrum of *R*-1Ph-B-BODIPY.

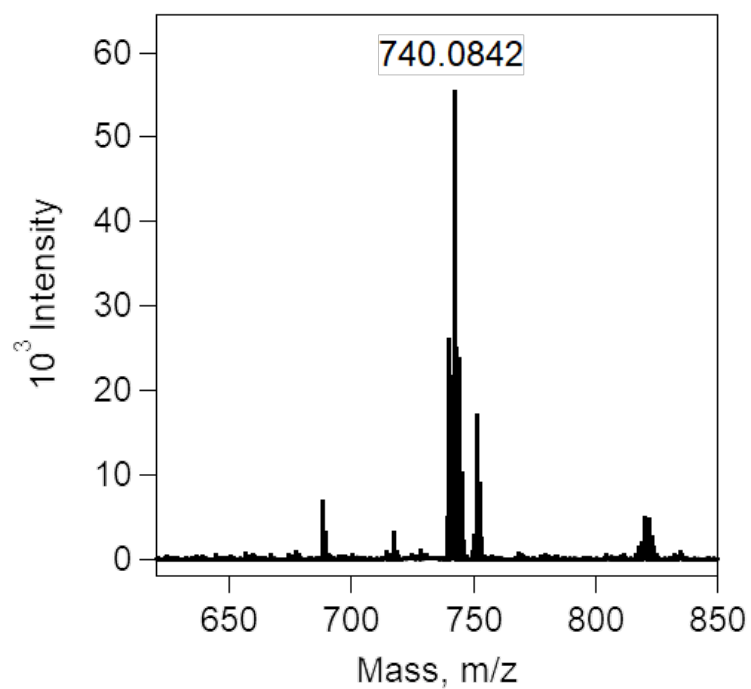

**Fig. S6** High resolution MALDI-TOF MS spectrum of *R*-1Ph-B-BODIPY.

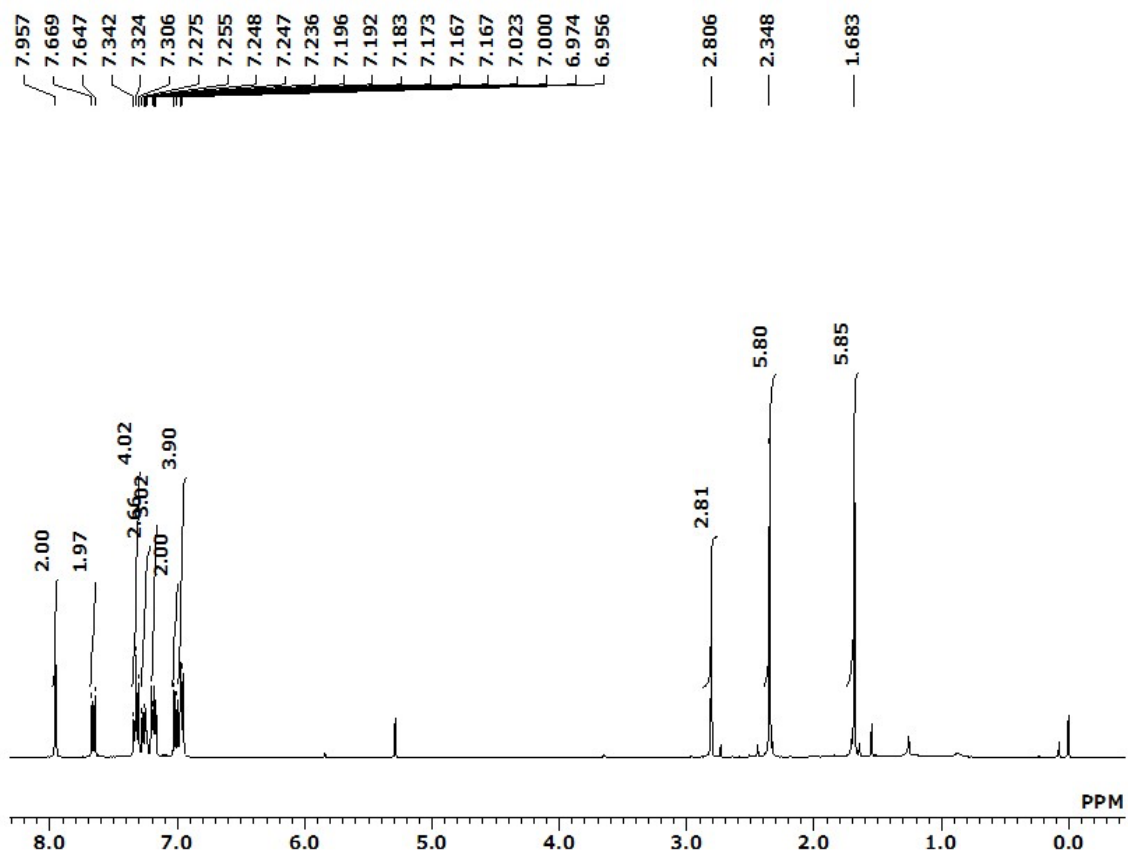

Fig. S7  $^1\text{H}$  NMR spectrum of *R*-2Ph-B-BODIPY.

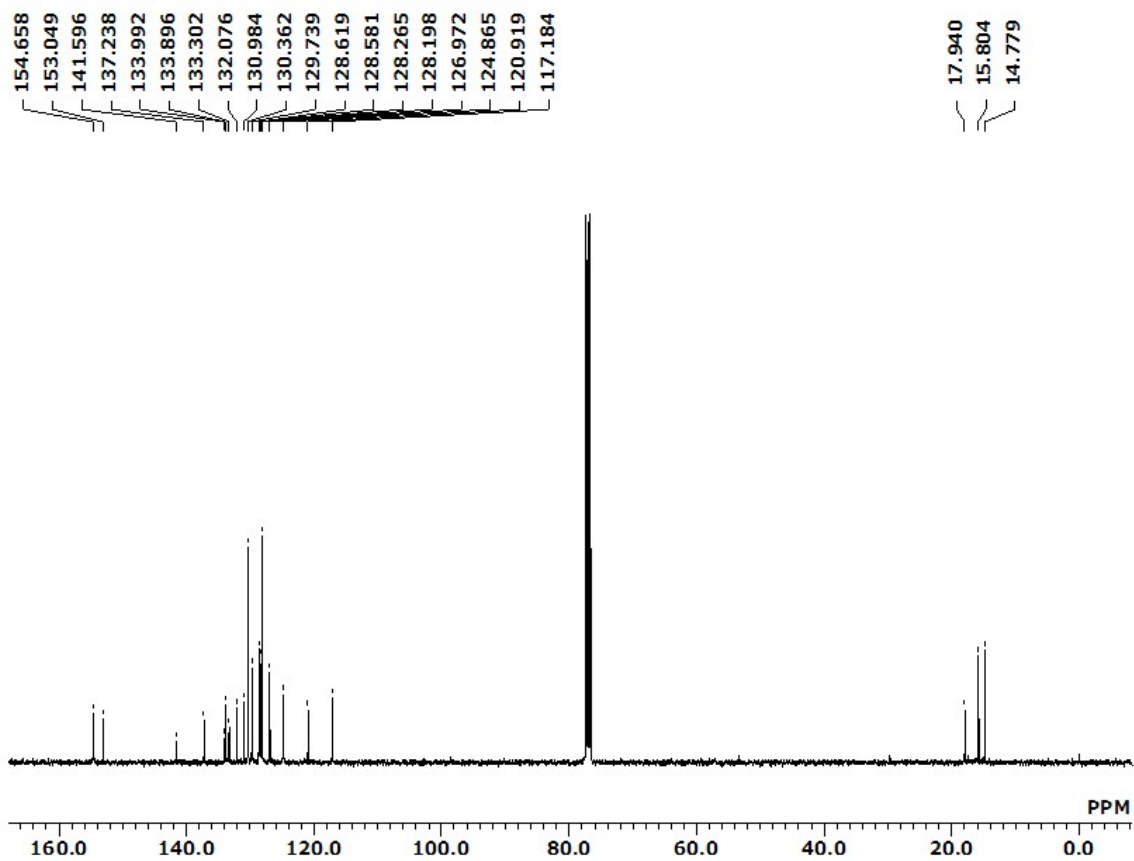

Fig. S8  $^{13}\text{C}$  NMR spectrum of *R*-2Ph-B-BODIPY.

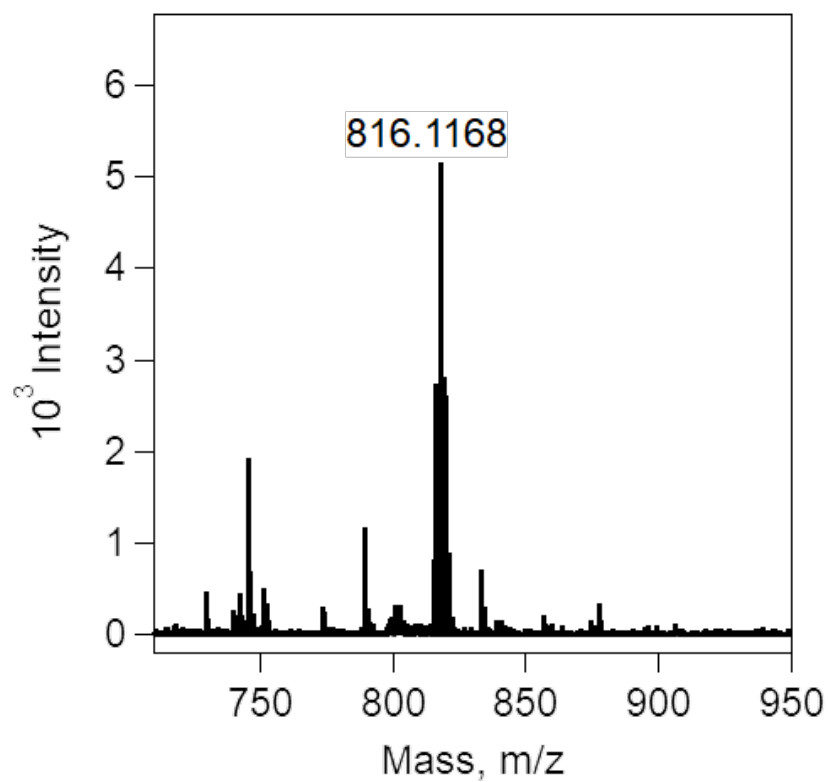

**Fig. S9** High resolution MALDI-TOF MS spectrum of *R*-2Ph-B-BODIPY.

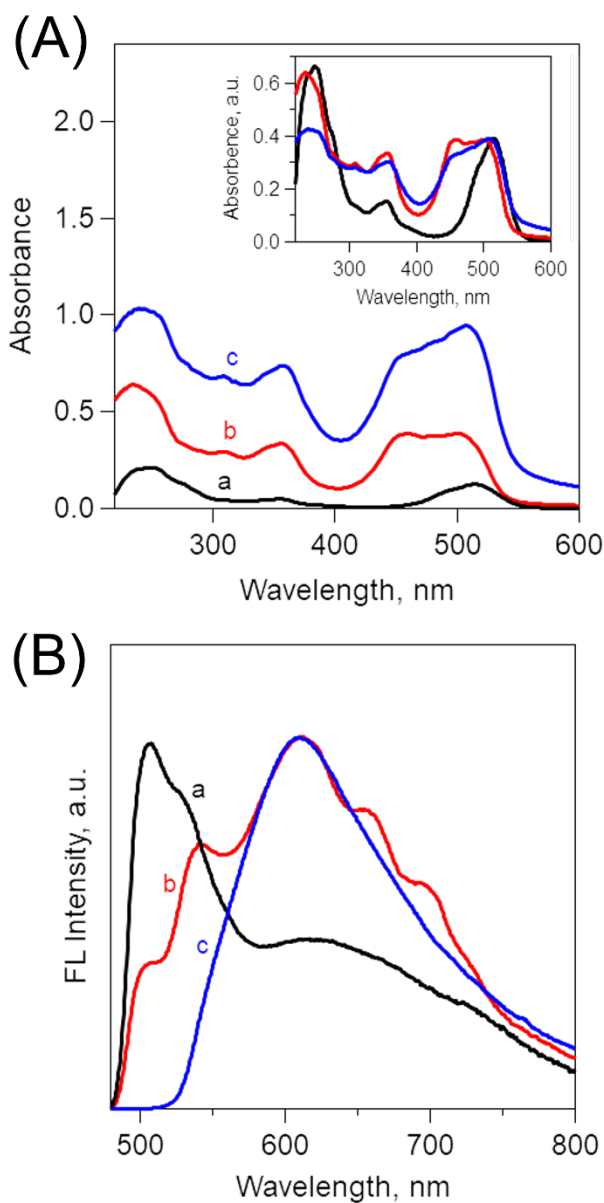

**Fig. S10** (A) Concentration-dependent absorption spectra of (OPh-B-BODIPY)<sub>m</sub>. (a) 3.0 μM, (b) 30 μM, and (c) 300 μM in H<sub>2</sub>O/THF = 99/1 (v/v). The insertion figure indicated the normalized spectra for comparison. (B) Concentration-dependent fluorescence spectra of (OPh-B-BODIPY)<sub>m</sub>, (a) 3.0 μM, (b) 30 μM, and (c) 300 μM.  $\lambda_{\text{ex.}} = 470$  nm. We can see a broad fluorescence spectrum derived from molecular aggregation under the experimental condition of 30 μM in H<sub>2</sub>O/THF = 99/1 (v/v).

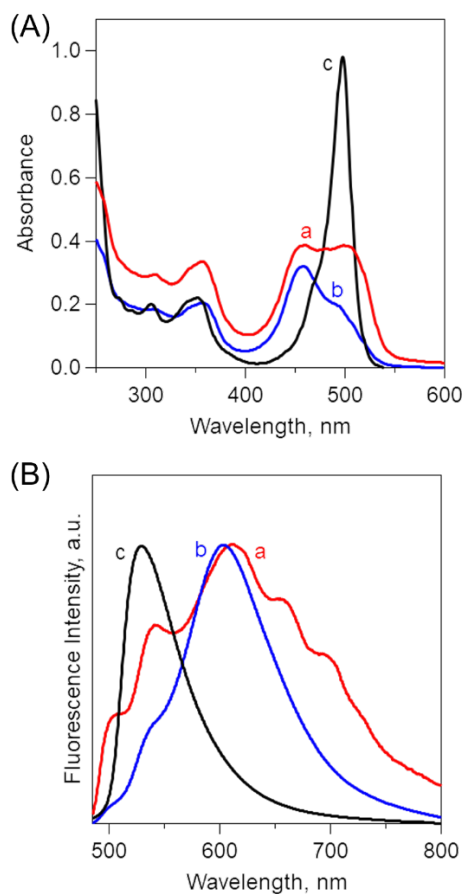

**Fig. S11** (A) Absorption spectra of (0Ph-B-BODIPY)<sub>m</sub> in a mixed solvent of H<sub>2</sub>O and THF with different volume ratios. (a) H<sub>2</sub>O/THF = 99/1 (v/v), (b) H<sub>2</sub>O/THF = 70/30 (v/v), and (c) H<sub>2</sub>O/THF = 50/50 (v/v). The final concentrations of 0Ph-B-BODIPY were fixed as constant (= 30 μM). (B) Absorption spectra of (0Ph-B-BODIPY)<sub>m</sub> in a mixture solvent of THF and water with different ratios. (a) H<sub>2</sub>O/THF = 99/1 (v/v), (b) H<sub>2</sub>O/THF = 70/30 (v/v), and (c) H<sub>2</sub>O/THF = 50/50 (v/v). The final concentration was fixed as constant (= 30 μM).  $\lambda_{\text{ex.}} = 470$  nm.



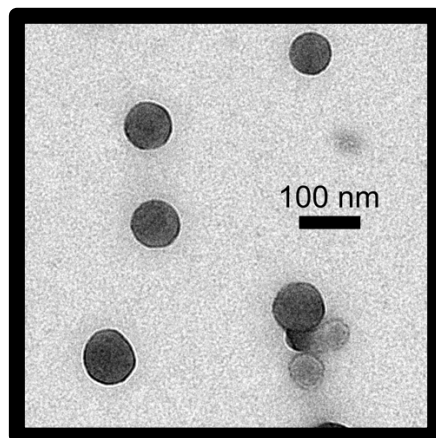

**Fig. S12** TEM image of  $(0\text{Ph-B-BODIPY})_m$  in  $\text{H}_2\text{O}/\text{THF} = 70/30$  (v/v). The final concentration of  $0\text{Ph-B-BODIPY}$  was  $30 \mu\text{M}$  in  $\text{H}_2\text{O}/\text{THF}$ .

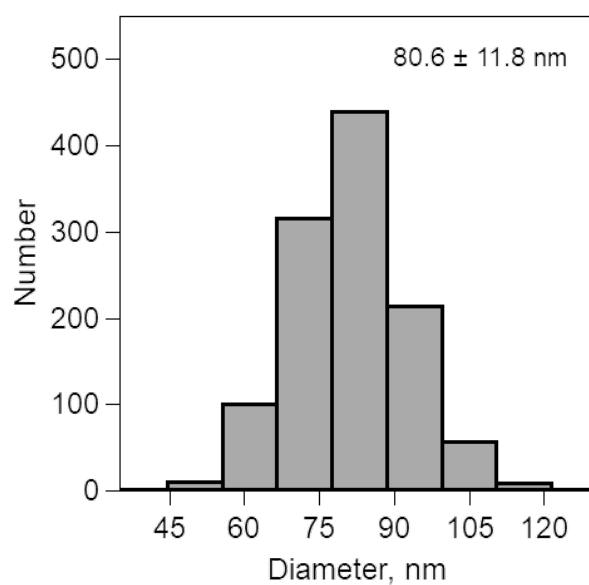

**Fig. S13** Diameter-distributions of (0Ph-B-BODIPY)<sub>m</sub> in H<sub>2</sub>O/THF = 70/30 (v/v) analysed by TEM images. The final concentration of 0Ph-B-BODIPY is 30 μM in H<sub>2</sub>O/THF.

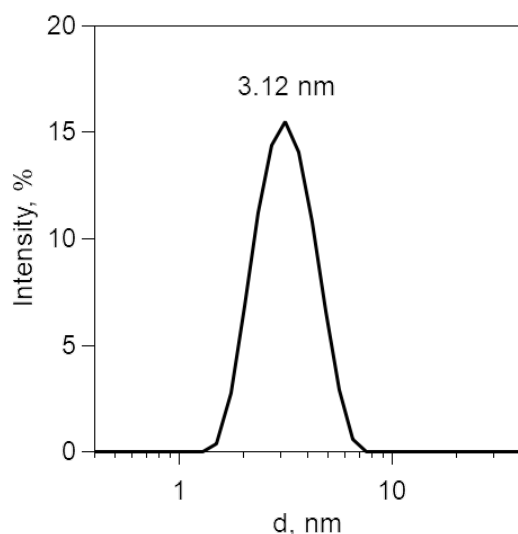

**Fig. S14** Size-distributions of (0Ph-B-BODIPY)<sub>m</sub> in H<sub>2</sub>O/THF = 50/50 (v/v) (final concentration of 0Ph-B-BODIPY: [0Ph-B-BODIPY] = 30 μM in H<sub>2</sub>O/THF) by dynamic light scattering (DLS) measurements.

To discuss the solvent ratio-dependent structural changes, the following two different (0Ph-B-BODIPY)<sub>m</sub> systems with volume ratios such as H<sub>2</sub>O/THF = 70/30 and 50/50 were prepared by maintaining the final concentrations (30 μM) in mixed solvents. Absorption and fluorescence spectra and TEM images of these systems prepared in H<sub>2</sub>O/THF = 70/30 and 50/50 (v/v) are totally different from those prepared in H<sub>2</sub>O/THF = 99/1 (v/v) (Figs. S11-S14 in ESI). Isotropic spherical assemblies prepared in H<sub>2</sub>O/THF = 70/30 (v/v) (Figs. S12-S13) are in sharp contrast with the anisotropic fibrous assemblies in H<sub>2</sub>O/THF = 99/1 (v/v) (Fig. 2A in the text). Furthermore, absorption and fluorescence spectra (Fig. S11) and dynamic light scattering (DLS) result (Fig. S14) in H<sub>2</sub>O/THF = 50/50 (v/v) demonstrated a monomer-like behavior, but not aggregate formations (No specific aggregate structures were observed by TEM measurements). Thus, such fibrous assemblies could be fabricated only under the excess volume condition of H<sub>2</sub>O relative to THF such as 30 μM 0Ph-B-BODIPY in H<sub>2</sub>O/THF = 99/1 (v/v).

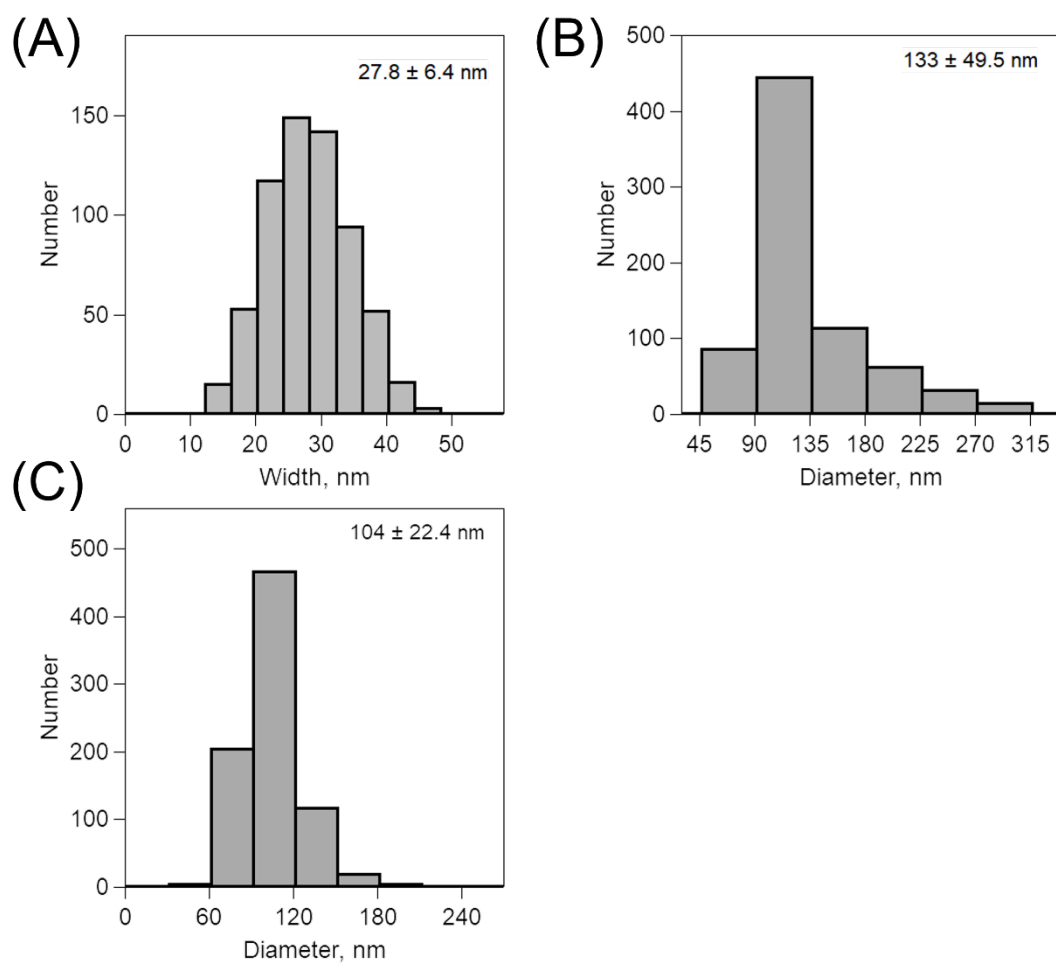

**Fig. S15** The width and diameter-distributions of B-BODIPY assemblies. (A) The width-distribution of (0Ph-B-BODIPY)<sub>m</sub> prepared in H<sub>2</sub>O/THF = 99/1 (v/v) ([0Ph-B-BODIPY] = 30 μM), (B) the diameter-distribution of (1Ph-B-BODIPY)<sub>m</sub> prepared in H<sub>2</sub>O/THF = 99/1 (v/v) ([1Ph-B-BODIPY] = 30 μM), and (C) the diameter-distribution of (2Ph-B-BODIPY)<sub>m</sub> prepared in H<sub>2</sub>O/THF = 99/1 (v/v) ([2Ph-B-BODIPY] = 30 μM).

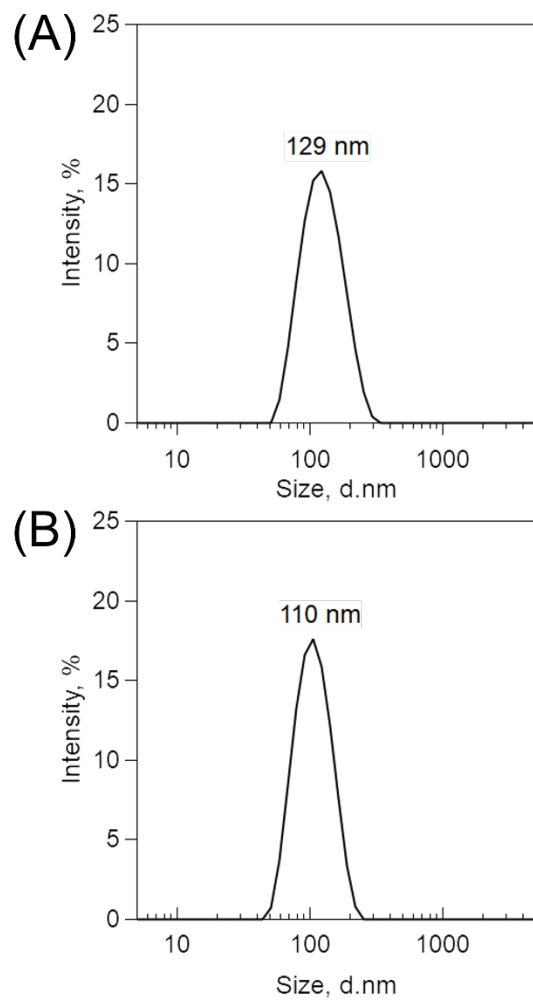

**Fig. S16** Size-distributions of (A) (1Ph-B-BODIPY)<sub>m</sub> prepared in H<sub>2</sub>O/THF = 99/1 (v/v) ([1Ph-B-BODIPY] = 30 μM) and (B) (2Ph-B-BODIPY)<sub>m</sub> prepared in H<sub>2</sub>O/THF = 99/1 (v/v) ([2Ph-B-BODIPY] = 30 μM) by dynamic light scattering (DLS) measurements.

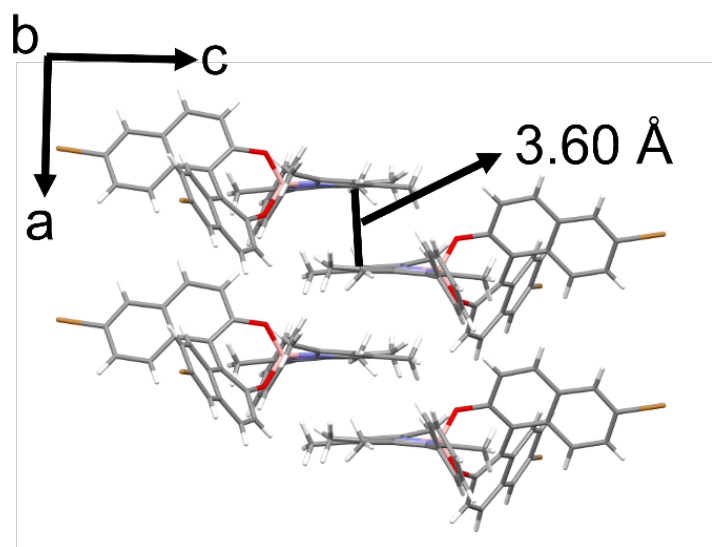

**Fig. S17** Single-crystal structures of  $\pi$ -stacking between two neighboring *R*-1Ph-B-BODIPY. Black line:  $\pi$ -stacking distance: 3.60 Å.

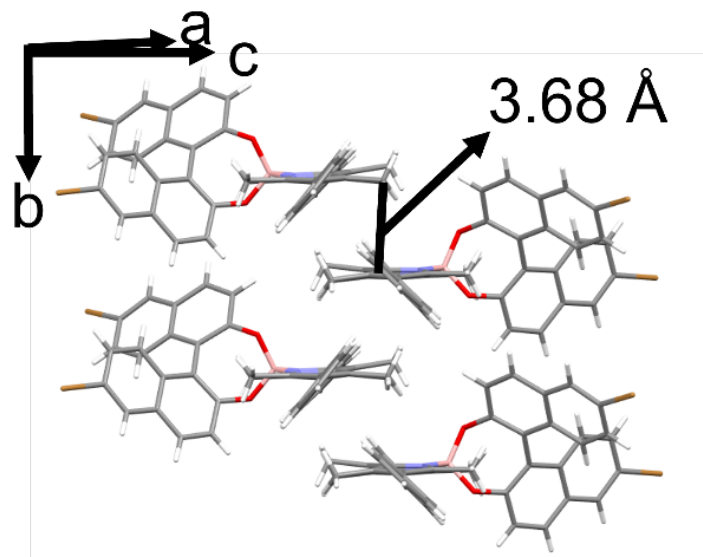

**Fig. S18** Single-crystal structures of  $\pi$ -stacking between two neighboring *R*-2Ph-BODIPY. Black line:  $\pi$ -stacking distance: 3.68 Å.

**Table S1.** Single crystal structures and crystallographic data of *R*-0Ph-B-BODIPY.

|                                        |                                                                                |
|----------------------------------------|--------------------------------------------------------------------------------|
| Compound                               | <i>R</i> -0Ph-B-BODIPY                                                         |
| Formula                                | C <sub>34</sub> H <sub>27</sub> BBr <sub>2</sub> N <sub>2</sub> O <sub>2</sub> |
| Formula Weight                         | 666.22                                                                         |
| Crystal System                         | Orthorhombic                                                                   |
| Space Group                            | P2 <sub>1</sub> 2 <sub>1</sub> 2 <sub>1</sub> (#19)                            |
| a, Å                                   | 6.8301(16)                                                                     |
| b, Å                                   | 21.461(5)                                                                      |
| c, Å                                   | 22.842(5)                                                                      |
| $\alpha$ , degree                      | 90.0000                                                                        |
| $\beta$ , degree                       | 90.018(6)                                                                      |
| $\gamma$ , degree                      | 90.0000                                                                        |
| V, Å <sup>3</sup>                      | 3348.2(14)                                                                     |
| Z                                      | 4                                                                              |
| D <sub>calc</sub> , g cm <sup>-3</sup> | 1.322                                                                          |



**Table S2.** Single crystal structures and crystallographic data of *R*-1Ph-B-BODIPY.

|                                        |                                                                                |
|----------------------------------------|--------------------------------------------------------------------------------|
| Compound                               | <i>R</i> -1Ph-B-BODIPY                                                         |
| Formula                                | C <sub>46</sub> H <sub>45</sub> BBr <sub>2</sub> N <sub>2</sub> O <sub>2</sub> |
| Formula Weight                         | 828.49                                                                         |
| Crystal System                         | Orthorhombic                                                                   |
| Space Group                            | P2 <sub>1</sub> 2 <sub>1</sub> 2 <sub>1</sub> (#19)                            |
| a, Å                                   | 6.7759(3)                                                                      |
| b, Å                                   | 22.5581(11)                                                                    |
| c, Å                                   | 26.3420(13)                                                                    |
| $\alpha$ , degree                      | 90.0000                                                                        |
| $\beta$ , degree                       | 90.0000                                                                        |
| $\gamma$ , degree                      | 90.0000                                                                        |
| V, Å <sup>3</sup>                      | 4026.4(3)                                                                      |
| Z                                      | 4                                                                              |
| D <sub>calc</sub> , g cm <sup>-3</sup> | 1.367                                                                          |

**Table S3.** Single crystal structures and crystallographic data of *R*-2Ph-B-BODIPY.

|                                        |                                                                                |
|----------------------------------------|--------------------------------------------------------------------------------|
| Compound                               | <i>R</i> -2Ph-B-BODIPY                                                         |
| Formula                                | C <sub>46</sub> H <sub>35</sub> BBr <sub>2</sub> N <sub>2</sub> O <sub>2</sub> |
| Formula Weight                         | 818.41                                                                         |
| Crystal System                         | Monoclinic                                                                     |
| Space Group                            | P2 <sub>1</sub> (#4)                                                           |
| a, Å                                   | 14.0582(3)                                                                     |
| b, Å                                   | 7.39498(13)                                                                    |
| c, Å                                   | 17.5218(3)                                                                     |
| $\alpha$ , degree                      | 90.0000                                                                        |
| $\beta$ , degree                       | 93.311(7)                                                                      |
| $\gamma$ , degree                      | 90.0000                                                                        |
| V, Å <sup>3</sup>                      | 1818.53(6)                                                                     |
| Z                                      | 2                                                                              |
| D <sub>calc</sub> , g cm <sup>-3</sup> | 1.495                                                                          |

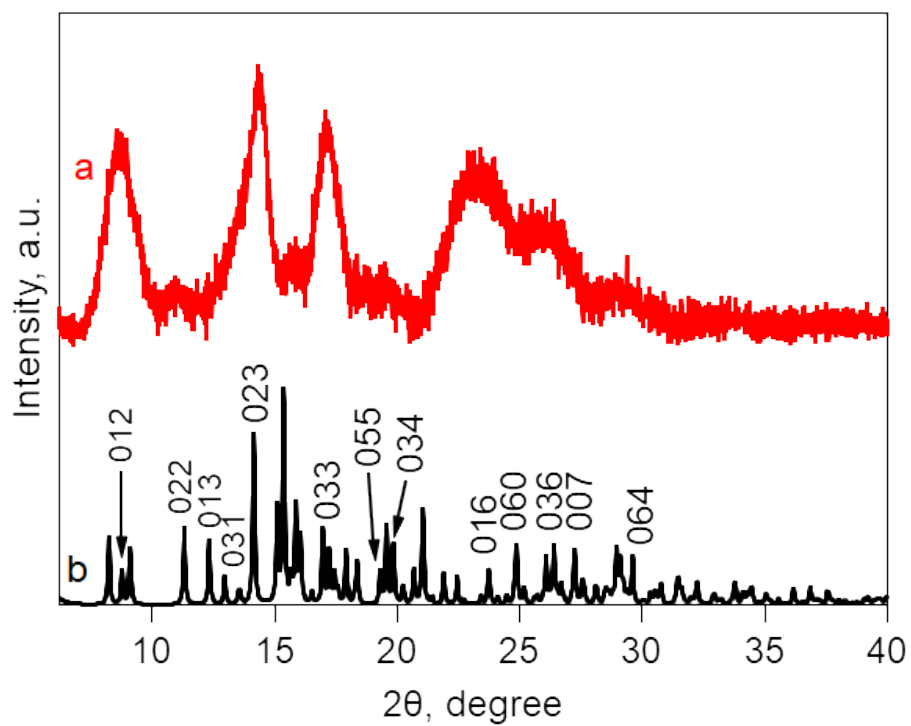

**Fig. S19** XRD patterns of (a)  $(0\text{Ph-B-BODIPY})_m$  prepared in  $\text{H}_2\text{O}/\text{THF} = 99/1$  (v/v) and (b) a simulated pattern from the crystal structure of 0Ph-B-BODIPY.

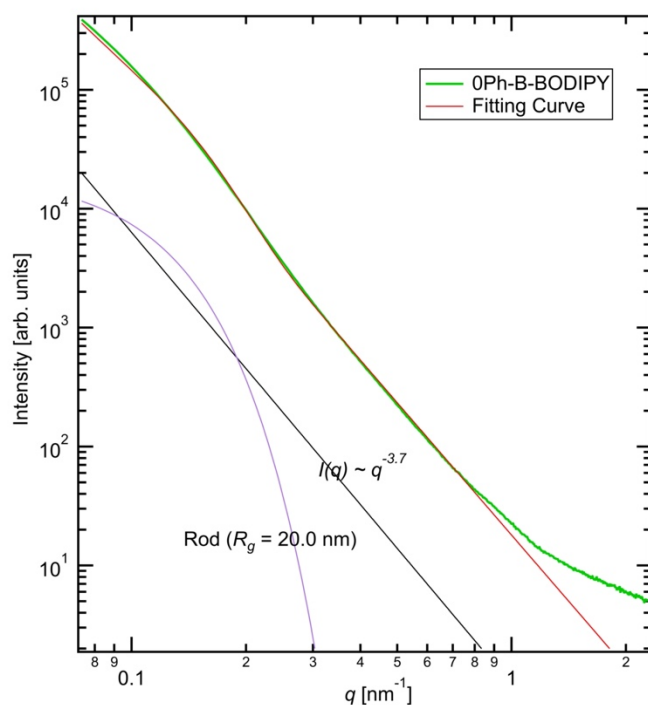

**Fig. S20** Small-angle X-ray scattering (SAXS) profile of (0Ph-B-BODIPY)<sub>m</sub> prepared in H<sub>2</sub>O/THF = 99/1 (v/v).

In SAXS profile of (0Ph-B-BODIPY)<sub>m</sub>, we fitted the profile with eq. (2), which is based on the cross-section plot, a method for analyzing fibrous aggregates.

$$I(q) = aq^{-3.7} + be^{-\frac{1}{2}q^2R_1^2} \quad (2)$$

Here,  $I(q)$  is scattering intensity,  $a$ , and  $b$  are constant,  $q$  is scattering angle, and  $R_1$  is radius of gyration for rods. The profile in the low- $q$  region is described by  $I(q) \sim q^{-3.7}$ . The scattering profile originates from the smooth interface owing to the surface dimension of 2.3. This interface is believed to be derived from micron-scaled particles. Eq. (2) could be fitted to the profile, and SAXS data also suggested fibrous assemblies of (0Ph-B-BODIPY)<sub>m</sub>. Consequently,  $R_1$  was calculated to be 20.0 nm, which is comparable to the width value in TEM image (Fig.2A and Fig. S11A in ESI†).

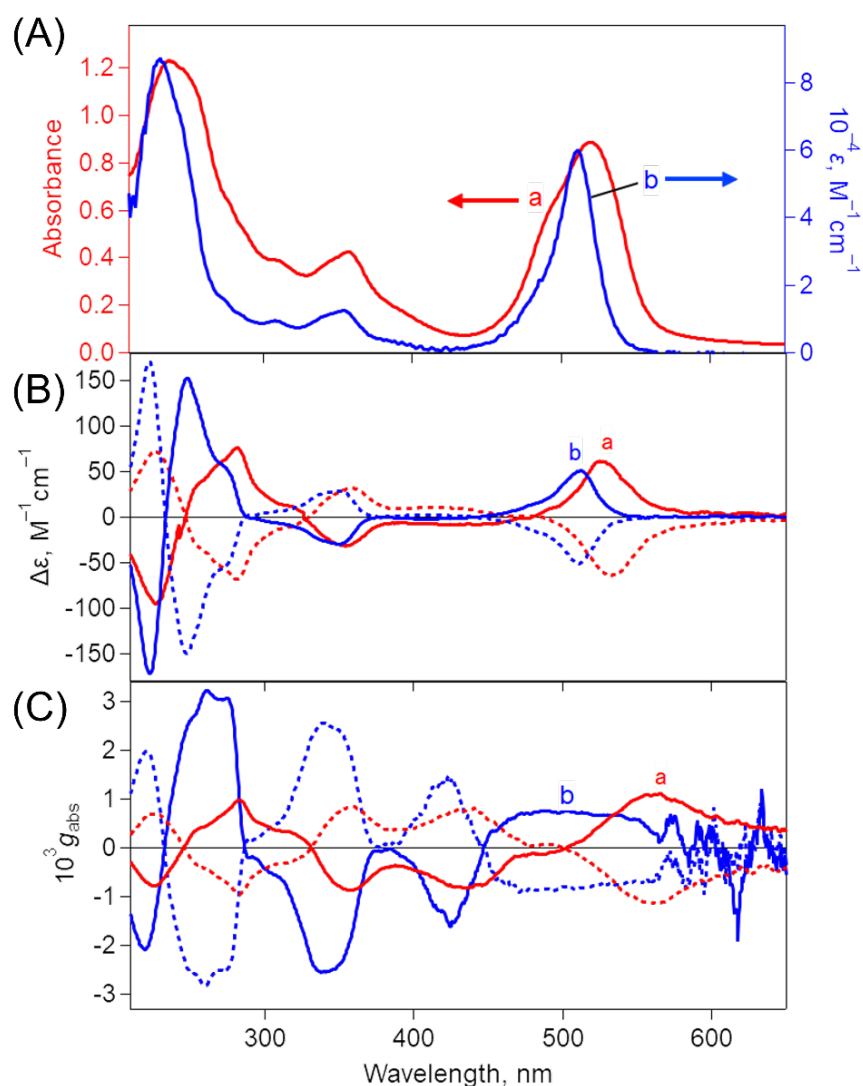

**Fig. S21** (A) Absorption spectra of (a) (1Ph-B-BODIPY)<sub>m</sub> prepared in H<sub>2</sub>O/THF = 99/1 (v/v). [1Ph-B-BODIPY] = 30 μM and (b) 1Ph-B-BODIPY in THF. (B) CD spectra of (a) (1Ph-B-BODIPY)<sub>m</sub> prepared in H<sub>2</sub>O/THF = 99/1 (v/v). [1Ph-B-BODIPY] = 30 μM and (b) 1Ph-B-BODIPY in THF. Solid and dotted lines correspond to *S* and *R* forms, respectively. (C) Dissymmetry factor ( $g_{abs}$ ) profiles of (a) (1Ph-B-BODIPY)<sub>m</sub> prepared in H<sub>2</sub>O/THF = 99/1 (v/v). [1Ph-B-BODIPY] = 30 μM and (b) 1Ph-B-BODIPY in THF. Solid and dotted lines correspond to *S* and *R* forms, respectively.

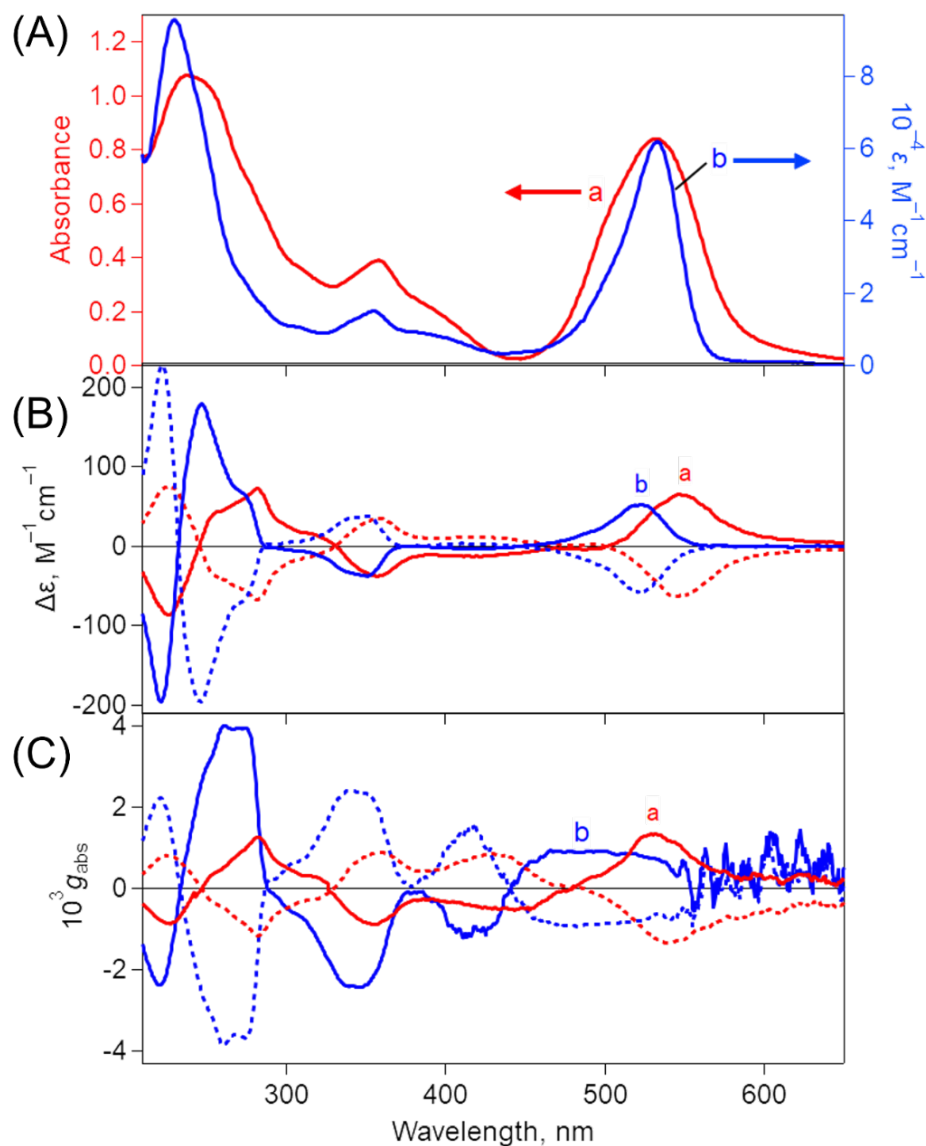

**Fig. S22** (A) Absorption spectra of (a) (2Ph-B-BODIPY)<sub>m</sub> prepared in H<sub>2</sub>O/THF = 99/1 (v/v). [2Ph-B-BODIPY] = 30 μM and (b) 2Ph-B-BODIPY in THF. (B) CD spectra of (a) (2Ph-B-BODIPY)<sub>m</sub> prepared in H<sub>2</sub>O/THF = 99/1 (v/v). [1Ph-B-BODIPY] = 30 μM and (b) 2Ph-B-BODIPY in THF. Solid and dotted lines correspond to *S* and *R* forms, respectively. (C) Dissymmetry factor ( $g_{abs}$ ) profiles of (a) (2Ph-B-BODIPY)<sub>m</sub> prepared in H<sub>2</sub>O/THF = 99/1 (v/v). [2Ph-B-BODIPY] = 30 μM and (b) 2Ph-B-BODIPY in THF. Solid and dotted lines correspond to *S* and *R* forms, respectively.

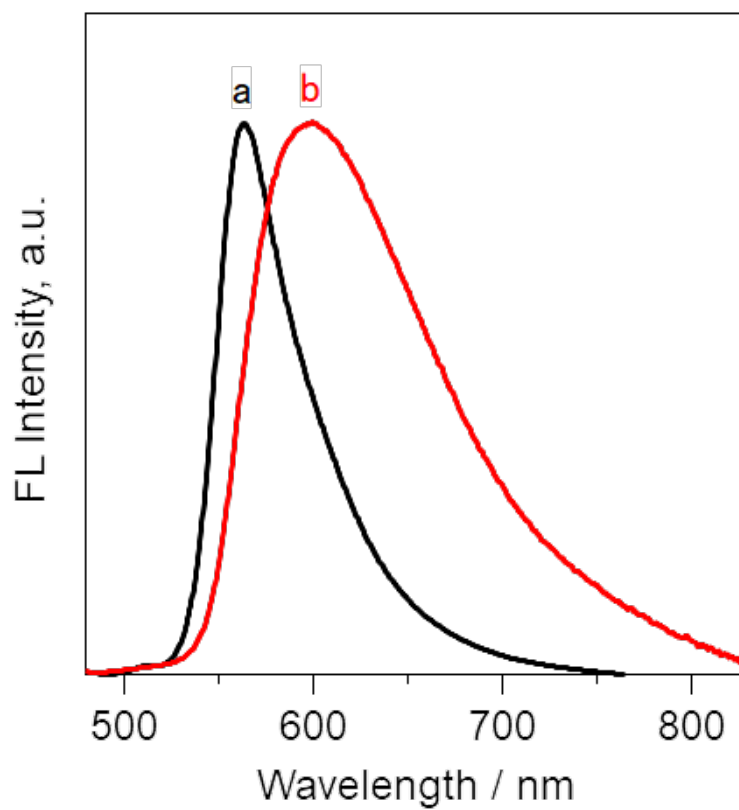

**Fig. S23** Fluorescence spectra of (a) 2Ph-B-BODIPY (monomer: black line) in THF and (b) (2Ph-B-BODIPY)<sub>m</sub> (red line) prepared in H<sub>2</sub>O/THF = 99/1 (v/v).  $\lambda_{\text{ex}}$ : 470 nm.

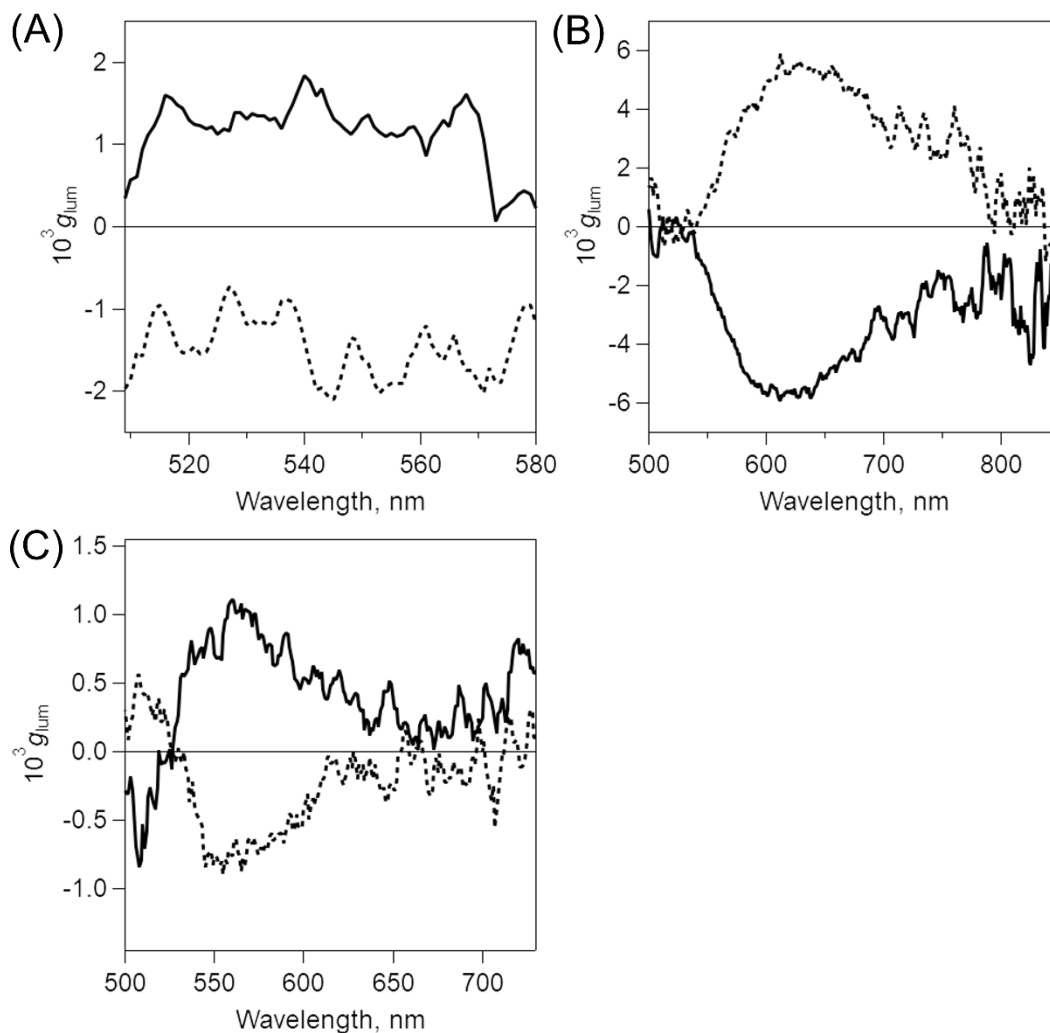

**Fig. S24** Dissymmetry factor ( $g_{lum}$ ) profiles corresponding to CPL spectra of (A) 0Ph-B-BODIPY (monomer) in THF,  $\lambda_{ex}$ : 350 nm. (B) (0Ph-B-BODIPY)<sub>m</sub> prepared in H<sub>2</sub>O/THF = 99/1 (v/v),  $\lambda_{ex}$ : 350 nm. (C) (1Ph-B-BODIPY)<sub>m</sub> prepared in H<sub>2</sub>O/THF = 99/1 (v/v),  $\lambda_{ex}$ : 350 nm. Solid and dotted lines correspond to *S* and *R* forms, respectively.



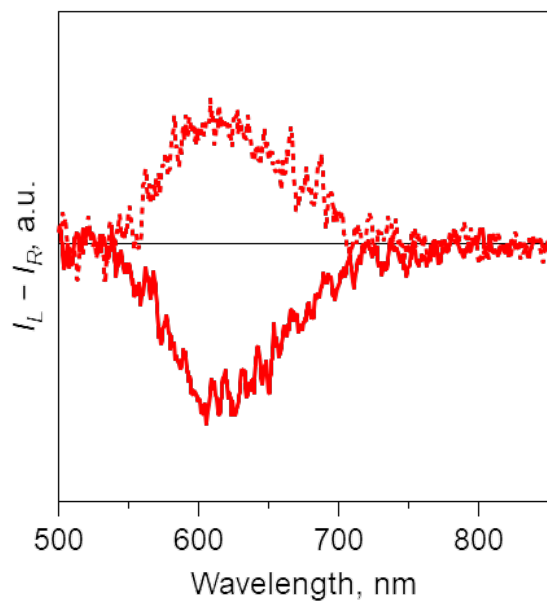

**Fig. S25** CPL spectra of (OPh-B-BODIPY)<sub>m</sub> prepared in H<sub>2</sub>O/THF = 70/30 (v/v). [OPh-B-BODIPY] = 30 μM, λ<sub>ex</sub>: 350 nm. Solid and dotted lines correspond to *S* and *R* forms, respectively.

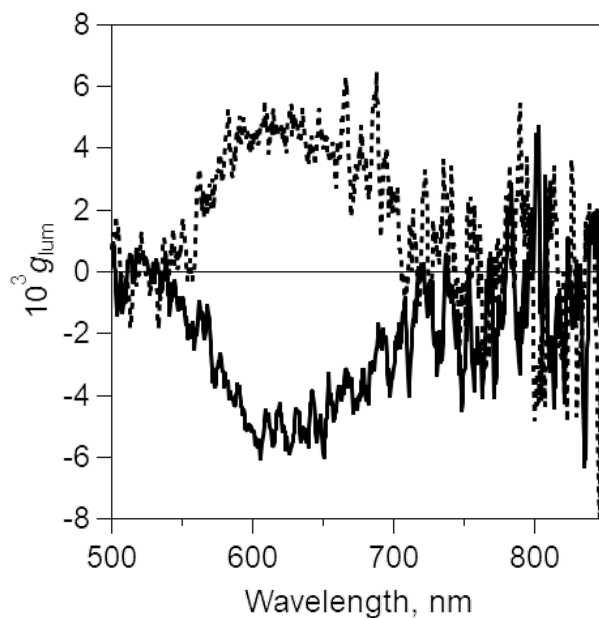

**Fig. S26** Dissymmetry factor ( $g_{lum}$ ) profiles corresponding to CPL spectra of  $(0\text{Ph-B-BODIPY})_m$  prepared in  $\text{H}_2\text{O}/\text{THF} = 70/30$  (v/v).  $[0\text{Ph-B-BODIPY}] = 30 \mu\text{M}$ ,  $\lambda_{ex}: 350 \text{ nm}$ . Solid and dotted lines correspond to *S* and *R* forms, respectively.

$(0\text{Ph-B-BODIPY})_m$  prepared in  $\text{H}_2\text{O}/\text{THF} = 70/30$  (v/v) demonstrated broader CPL spectra relative to the monomers, whereas the corresponding  $g_{lum}$  value slightly decreased as compared to that in  $\text{H}_2\text{O}/\text{THF} = 99/1$  (v/v) (Figs.S25 and S26). The plausible reason is attributable due to the relative weak interaction between nearby  $0\text{Ph-B-BODIPY}$  molecules. In contrast, in the case of  $(0\text{Ph-B-BODIPY})_m$  prepared in  $\text{H}_2\text{O}/\text{THF} = 50/50$  (v/v), unfortunately we could not observe appropriate CPL spectra despite the repeated measurements due to the unstable suspension of  $(0\text{Ph-B-BODIPY})_m$  in  $\text{H}_2\text{O}/\text{THF}$ . This strongly suggested that the excess volume condition of  $\text{H}_2\text{O}$  (poor solvent) relative to THF (good solvent) (e.g.,  $\text{H}_2\text{O}/\text{THF} = 99/1$  (v/v)) play an important role for preparation of stable aggregate structures.
